# Supplementary material for: Preconditioning with Substance P Restores Therapeutic Efficacy of Aged ADSC by Elevating TNFR2 and Paracrine Potential
Source: MDPI journal article supplement (doi:10.3390/biology12121458), 2023-11-22
Supplement: s1 [file s1]

# Supplementary Figure S1

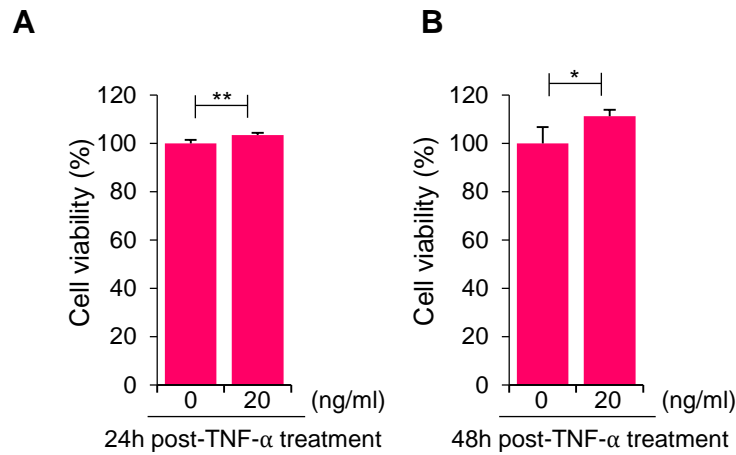

**Supplementary Figure S1. The lower-dose of TNF-α does not impair ADSC-E viability**

A. After treating ADSC-E with 20 ng/ml TNF-α for 24 hours, cell viability was evaluated by WST-1 assay. B. After treating ADSC-E with 20 ng/ml TNF-α for 48 hours, cell viability was evaluated by WST-1 assay. *p* values of less than 0.05 were considered statistically significant (\**p* < 0.05, \*\**p* < 0.01). The data are expressed as the mean ± standard deviation (SD) of three independent experiments.

# Supplementary Figure S2

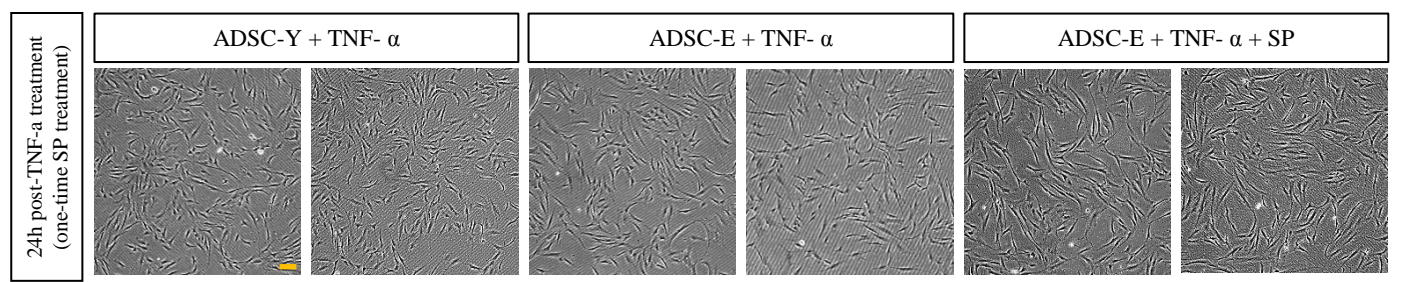

**Supplementary Figure S2. The effects of one-time SP treatment on ADSC-E morphology changes under inflammatory conditions.**  
ADSC-E was treated with SP and 24 later, exposed to TNF- $\alpha$  . The cellular morphology of ADSCs was observed at 24 h post-treatment of TNF- $\alpha$ . Scale bar: 100  $\mu$ m.

# Supplementary Figure S3

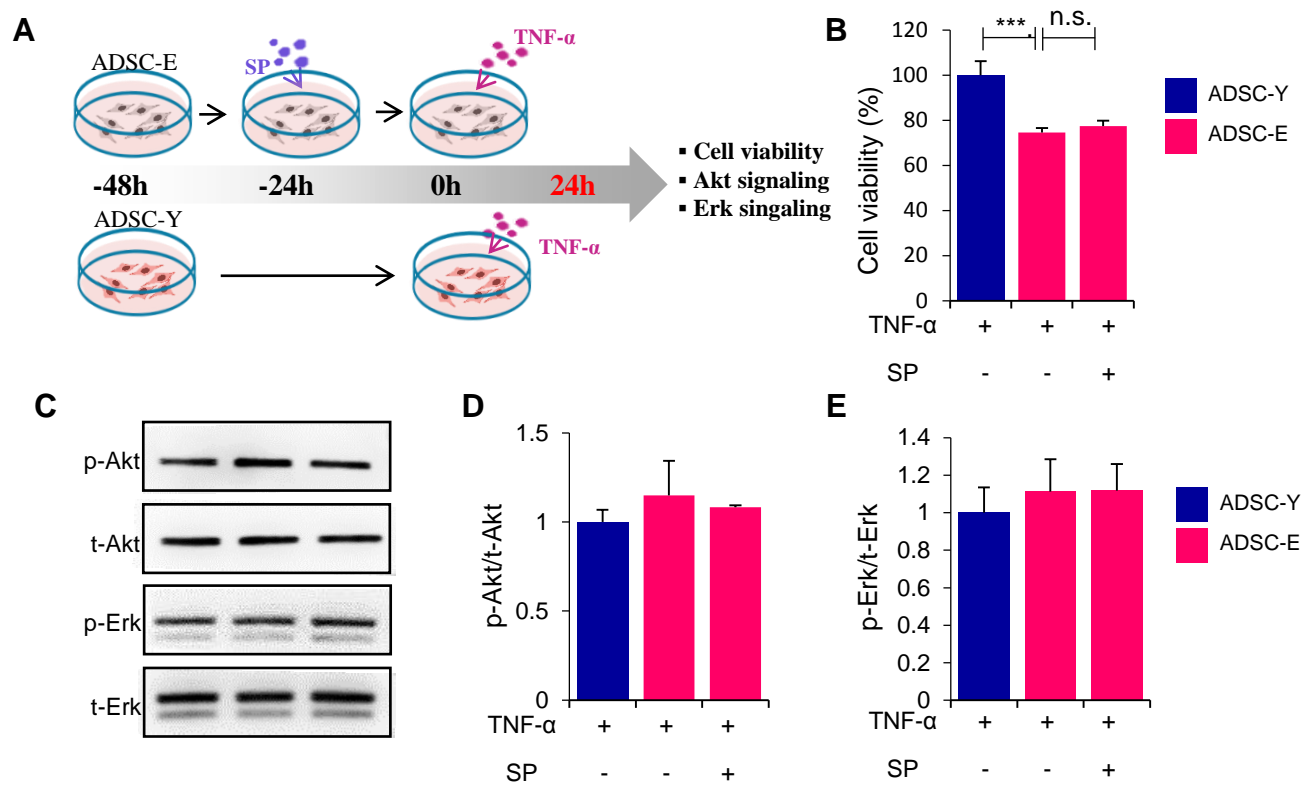

**Supplementary Figure S3. The effect of one-time SP treatment on ADSC-Y cellular viability and Akt/Erk signaling.**

(A) Experimental scheme for SP and TNF- $\alpha$  treatment. (B) After treating ADSC with SP and TNF- $\alpha$ , cell viability was evaluated by WST-1 assay. (C-E) p-Akt/t-Akt and p-Erk/t-Erk protein levels were detected by Western blot analysis, and their expression level was quantified using the Image J program.  $p$  values of less than 0.05 were considered statistically significant (\*\*\*) $p < 0.001$ ). The data are expressed as the mean  $\pm$  standard deviation (SD) of three independent experiments.
