# Supplementary figures and images for: Preconditioning with Substance P Restores Therapeutic Efficacy of Aged ADSC by Elevating TNFR2 and Paracrine Potential
Source: MDPI journal article supplement (doi:10.3390/biology12121458), 2023-11-22

**Fig 2A**

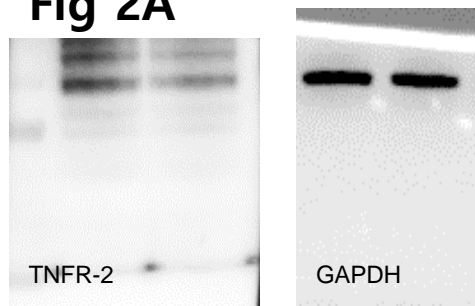

**Fig 3D**

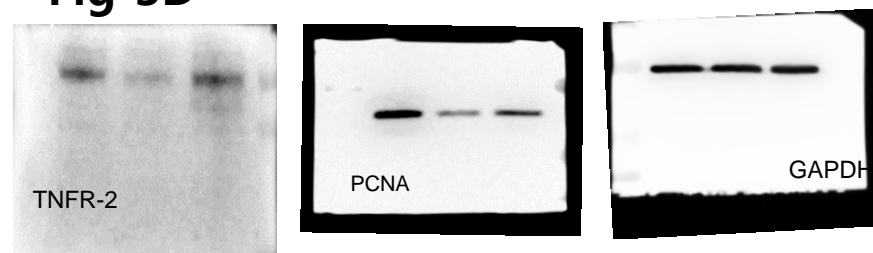

**Fig 2B**

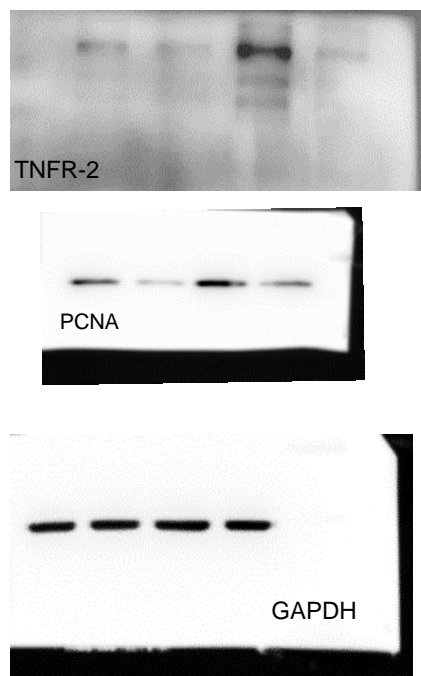

**Fig 4D**

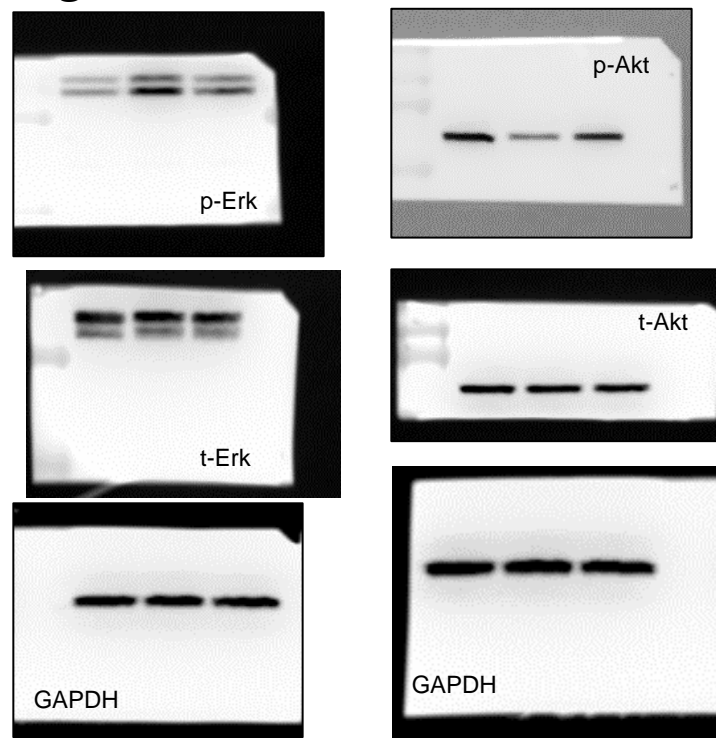

# Supplementary Figure S3

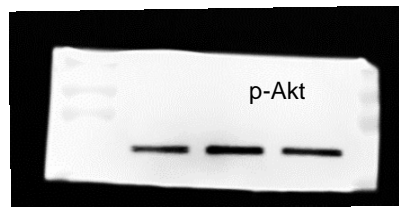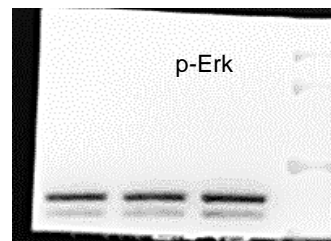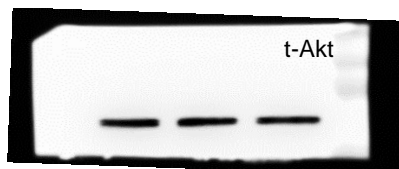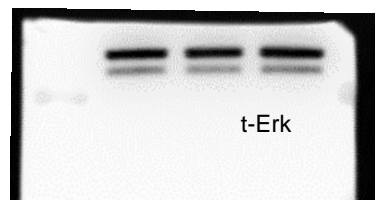

Supplement: s1 [file s1]
